# Supplementary material for: Do Infants in the First Year of Life Expect Equal Resource Allocations?
Source: Front Psychol. 2019 Feb 19;10:116. doi: 10.3389/fpsyg.2019.00116 (PMC6389704; doi:10.3389/fpsyg.2019.00116)
Supplement: TABLE S1 — Participant information and looking-time data for Experiments 1 through 4. [file Table_1.XLSX]

## Sheet: Experiment 1
											Initial Stage (Percentage)		Final Stage (s)		Reliabilities (Percentage)
	Participant ID	Condition	Event	Give to/ Give to first	Sex	Age (months)	Age (days)	Age in days (total)	Siblings		Familiarization Trial	Test Trial	Familiarization Trial	Test Trial	Familiarization Trial	Test Trial
	54	Experimental	Unequal	right	M	9	9	279	2		0.833333	0.95	19.9	16	0.99	0.97
	163	Experimental	Unequal	right	M	8	22	262	2		1	1	14.3	24	0.9	0.96
	167	Experimental	Unequal	right	M	8	16	256	1		1	0.953846	11.1	20.2	0.99	0.88
	24	Experimental	Unequal	left	M	9	24	294	0		0.941667	0.988462	26.7	26.9	0.84	0.94
	98	Experimental	Unequal	left	M	8	20	260	0		0.95	1	59.4	38.3	0.94	0.92
	102	Experimental	Unequal	left	M	9	3	273	0		0.966667	0.996154	12.1	12	0.88	0.85
	29	Experimental	Unequal	right	F	9	25	295	0		0.975	0.996154	18.4	26.1	0.96	0.89
	79	Experimental	Unequal	right	F	9	10	280	0		1	1	6.5	22	0.98	0.99
	25	Experimental	Unequal	left	F	8	9	249	2		1	1	7.5	13.7	0.97	0.99
	34	Experimental	Unequal	left	F	9	23	293	1		0.975	0.984615	23.5	31.2	0.96	0.97
	110	Experimental	Equal	right	M	9	3	273	0		1	0.996154	22.5	19.4	0.98	0.95
	112	Experimental	Equal	right	M	8	19	259	1		0.825	0.996154	5.7	8.8	0.96	0.85
	35	Experimental	Equal	left	M	10	8	308	0		0.85	0.980769	12.5	13.7	0.9	0.96
	119	Experimental	Equal	left	M	9	8	278	1		0.966667	0.988462	10.9	12	0.96	0.98
	56	Experimental	Equal	right	F	9	24	294	0		1	0.984615	11	23.1	0.96	0.89
	96	Experimental	Equal	right	F	9	21	291	1		1	0.996154	30.4	10.9	0.98	0.99
	26	Experimental	Equal	left	F	9	20	290	0		0.675	0.992308	11.2	15.9	0.99	0.83
	33	Experimental	Equal	left	F	9	17	287	1		1	1	39.2	9.2	0.98	0.96
	162	Experimental	Equal	left	F	9	20	290	1		1	1	15.1	14.8	0.79	0.94
	170	Experimental	Equal	left	F	9	0	270	0		0.941667	0.976923	8.8	12.7	0.88	0.93
							Means	279.05			0.945	0.989038	18.335	18.545	0.9395	0.932
	45	Inanimate-Control	Unequal	right	M	9	11	281	1		0.883333	0.953846	11.8	13.6	0.98	0.94
	93	Inanimate-Control	Unequal	right	M	9	12	282	1		0.941667	0.992308	6.8	20.1	0.92	0.77
	39	Inanimate-Control	Unequal	left	M	9	7	277	0		0.891667	1	7.5	8.1	0.95	0.91
	77	Inanimate-Control	Unequal	left	M	10	4	304	1		0.658333	0.926923	5.8	17.1	0.83	0.92
	80	Inanimate-Control	Unequal	left	M	9	5	275	2		0.708333	0.884615	19.3	14.9	0.94	0.94
	69	Inanimate-Control	Unequal	right	F	9	15	285	1		0.925	0.980769	22.5	9	0.96	0.99
	42	Inanimate-Control	Unequal	left	F	9	10	280	1		0.933333	1	15.5	8.8	0.96	0.94
	72	Inanimate-Control	Unequal	left	F	9	26	296	1		1	0.988462	12.8	9.2	0.81	0.92
	105	Inanimate-Control	Unequal	left	F	8	15	255	1		1	0.988462	60	13.6	0.93	0.97
	182	Inanimate-Control	Unequal	left	F	9	21	291	2		0.891667	0.946154	21.9	28.4	0.93	0.92
	90	Inanimate-Control	Equal	right	M	9	27	297	2		1	0.9	26.7	38.1	0.91	0.96
	97	Inanimate-Control	Equal	right	M	9	15	285	0		1	1	5.4	21.7	0.92	0.91
	178	Inanimate-Control	Equal	left	M	10	4	304	0		0.966667	0.953846	16	11	0.98	0.99
	43	Inanimate-Control	Equal	left	M	9	8	278	2		0.633333	0.888462	11	30.4	0.97	0.88
	66	Inanimate-Control	Equal	left	M	8	15	255	3		0.491667	0.826923	13.1	9.7	0.89	0.83
	61	Inanimate-Control	Equal	right	F	8	21	261	0		0.858333	0.934615	6	9.3	0.96	0.99
	70	Inanimate-Control	Equal	right	F	10	8	308	1		0.625	1	5.7	8.2	0.87	0.95
	73	Inanimate-Control	Equal	right	F	8	20	260	2		0.9	1	10.5	10.9	0.86	0.96
	91	Inanimate-Control	Equal	right	F	9	4	274	1		0.633333	0.726923	10.7	8.2	0.89	0.84
	44	Inanimate-Control	Equal	left	F	9	2	272	1		0.633333	0.984615	38.6	16	0.93	0.98
							Means	281			0.82875	0.943846	16.38	15.315	0.9195	0.9255

## Sheet: Experiment 2
												Initial Stage (Percentage)		Final Stage (s)		Reliabilities (Percentage)
	Participant ID	Condition	Event	Give to/Give to first	Lift R/L cover first	Sex	Age (months)	Age (days)	Age in days (total)	Siblings		Familiarization Trial	Test Trial	Familiarization Trial	Test Trial	Familiarization Trial	Test Trial
	36	Cover-Experimental	Unequal	right	right	M	8	21	261	1		0.658333	1	51.6	8.3	0.99	1
	37	Cover-Experimental	Unequal	right	right	M	9	7	277	0		0.866667	0.983333	25.3	13.2	0.91	0.97
	13	Cover-Experimental	Unequal	left	right	M	8	5	245	0		1	0.966667	35.7	31.1	0.96	0.94
	19	Cover-Experimental	Unequal	left	left	M	10	5	305	0		0.983333	0.95	9	16.4	0.76	0.91
	21	Cover-Experimental	Unequal	left	right	M	8	13	253	0		1	0.971429	32.9	27.3	0.98	0.94
	32	Cover-Experimental	Unequal	Left	left	M	10	0	300	0		1	1	14.2	23.2	0.99	0.93
	15	Cover-Experimental	Unequal	right	left	F	8	15	255	0		1	1	30.2	33.6	0.92	0.95
	11	Cover-Experimental	Unequal	left	left	F	8	1	241	1		1	1	14.3	27.9	0.97	0.97
	17	Cover-Experimental	Unequal	left	right	F	8	15	255	0		1	1	19.1	15.5	0.74	0.94
	27	Cover-Experimental	Unequal	left	left	F	9	26	296	1		0.808333	1	11.4	29.6	0.99	0.96
	44	Cover-Experimental	Equal	right	left	M	9	18	288	1		1	1	23.2	16.1	0.83	0.99
	10	Cover-Experimental	Equal	left	right	M	8	17	257	0		1	0.988095	40.3	15.9	0.91	0.93
	39	Cover-Experimental	Equal	right	right	F	9	3	273	1		0.891667	1	14.9	15.5	0.95	0.9
	40	Cover-Experimental	Equal	right	right	F	9	12	282	2		0.983333	1	6.4	15.8	0.91	0.98
	25	Cover-Experimental	Equal	right	right	F	9	19	289	0		1	1	30.5	16.3	0.96	0.99
	41	Cover-Experimental	Equal	left	right	F	9	1	271	1		1	1	6.1	12.6	0.93	0.97
	6	Cover-Experimental	Equal	left	left	F	9	12	282	2		0.95	0.992857	8.9	11	0.97	0.92
	9	Cover-Experimental	Equal	left	right	F	10	8	308	0		0.975	0.990476	12.2	16.5	0.84	0.89
	18	Cover-Experimental	Equal	left	right	F	9	11	281	1		1	1	9.2	13.1	0.92	0.92
	31	Cover-Experimental	Equal	left	left	F	8	16	256	2		0.908333	0.952381	15	12.8	0.96	0.98
								Means	273.75			0.95125	0.989762	20.52	18.585	0.9195	0.949
	134	Cover-Control	Unequal	right	right	M	9	21	291	1		0.933333	1	11.3	12.8	0.94	0.96
	168	Cover-Control	Unequal	right	left	M	8	5	245	1		1	1	11.2	29.3	0.91	0.97
	145	Cover-Control	Unequal	left	right	M	8	14	254	0		1	1	11.6	11.3	0.94	0.99
	149	Cover-Control	Unequal	left	left	M	9	10	280	0		0.933333	0.969231	27.6	13.2	0.96	0.88
	175	Cover-Control	Unequal	left	left	M	9	10	280	1		1	1	22.5	16.2	0.97	0.91
	140	Cover-Control	Unequal	right	left	F	9	20	290	4		1	1	7.4	12.1	0.93	0.98
	180	Cover-Control	Unequal	right	right	F	9	13	283	0		1	1	22.1	8.8	0.98	1
	141	Cover-Control	Unequal	left	left	F	9	6	276	1		1	0.980769	60	8.8	0.97	0.97
	146	Cover-Control	Unequal	left	right	F	8	16	256	1		0.95	0.980769	7.4	8.6	0.95	0.97
	154	Cover-Control	Unequal	left	right	F	9	5	275	0		1	1	13.7	20.2	0.95	0.91
	136	Cover-Control	Equal	right	right	M	9	13	283	0		1	1	11.5	9.6	0.96	0.98
	177	Cover-Control	Equal	right	left	M	9	5	275	1		1	1	23.8	31.2	0.92	0.96
	143	Cover-Control	Equal	left	right	M	9	8	278	0		0.966667	1	6.6	12.4	0.91	0.92
	169	Cover-Control	Equal	left	right	M	8	20	260	1		0.883333	0.976923	16.4	15.6	0.98	0.91
	171	Cover-Control	Equal	left	right	M	8	21	261	0		0.975	1	45	19.5	0.95	0.99
	135	Cover-Control	Equal	right	left	F	8	15	255	1		1	1	6.6	17.5	0.91	0.94
	144	Cover-Control	Equal	right	left	F	8	19	259	1		1	1	37.2	28.1	0.93	0.96
	174	Cover-Control	Equal	right	right	F	8	15	255	0		1	1	10.1	13.6	1	0.96
	191	Cover-Control	Equal	right	left	F	9	4	274	2		0.85	0.923077	5.7	8	0.91	0.97
	192	Cover-Control	Equal	left	left	F	8	17	257	0.01		1	1	5.6	12.2	0.98	0.99
								Means	269.35			0.974583	0.991538	18.165	15.45	0.9475	0.956

## Sheet: Experiment 3
											Initial Stage (Percentage)		Final Stage (s)		Reliabilities (Percentage)
	Participant ID	Condition	Event	Give to/Give to first	Sex	Age (months)	Age (days)	Age in days (total)	Siblings		Familiarization Trial	Test Trial	Familiarization Trial	Test Trial	Familiarization Trial	Test Trial
	8	two-item	Unequal	right	M	8	13	253	1		0.938462	0.963636	8.7	41.7	0.94	0.95
	30	two-item	Unequal	right	M	8	8	248	1		1	1	36.5	24.1	0.96	0.98
	10	two-item	Unequal	left	M	9	7	277	0		1	1	7.5	10.8	0.99	0.97
	15	two-item	Unequal	left	M	8	6	246	2		0.930769	0.99697	13	17.4	0.99	0.96
	21	two-item	Unequal	left	M	9	2	272	2		0.853846	0.930303	17.4	11.3	0.84	0.97
	1	two-item	Unequal	right	F	8	1	241	0		0.884615	1	9	19.8	0.9	0.98
	2	two-item	Unequal	right	F	8	1	241	0		0.976923	0.990909	21.6	26.6	0.89	0.89
	11	two-item	Unequal	left	F	8	15	255	1		0.930769	0.990909	7.4	20.8	0.96	0.95
	16	two-item	Unequal	left	F	9	22	292	1		0.946154	1	31.5	29.3	0.92	0.93
	17	two-item	Unequal	left	F	9	17	287	0		0.961538	1	19.6	25.9	0.93	0.98
	3	two-item	Equal	right	M	9	21	291	0		1	0.981818	15.3	15.5	0.86	0.92
	4	two-item	Equal	right	M	9	7	277	1		0.953846	0.993939	8.2	24.7	0.97	0.97
	25	two-item	Equal	left	M	8	19	259	0		0.976923	1	17.8	19.4	0.99	0.9
	31	two-item	Equal	left	M	9	3	273	0		0.9	1	7.9	19.3	0.82	0.92
	6	two-item	Equal	right	F	8	10	250	0		1	1	29.4	11.8	0.98	0.98
	9	two-item	Equal	right	F	9	13	283	0		0.992308	0.99697	15.7	12.8	0.92	0.93
	19	two-item	Equal	right	F	8	21	261	1		1	1	7.5	13.9	0.96	0.98
	27	two-item	Equal	right	F	8	11	251	1		0.915385	0.972727	13.6	8.8	0.79	0.95
	13	two-item	Equal	left	F	9	9	279	0		0.976923	0.990909	9.7	16.7	0.99	0.98
	20	two-item	Equal	left	F	9	10	280	1		0.969231	1	18.7	10.8	0.94	0.98
							Means	265.8			0.955385	0.990455	15.8	19.07	0.927	0.9535
	2	four-item	Unequal	right	M	9	24	294	0		0.866667	1	14.2	22.4	0.98	0.96
	17	four-item	Unequal	left	M	8	28	268	0		1	1	57.2	16.8	0.94	0.98
	20	four-item	Unequal	left	M	8	13	253	0		1	1	7.2	27.6	0.95	0.98
	1	four-item	Unequal	right	F	9	29	299	0		0.9	0.953846	7	15.2	0.95	0.97
	4	four-item	Unequal	right	F	8	5	245	1		0.866667	0.982051	24.9	24.6	0.95	0.97
	19	four-item	Unequal	right	F	8	10	250	0		1	1	9.5	9.5	0.9	0.98
	22	four-item	Unequal	right	F	9	15	285	1		0.883333	0.979487	17.6	25.5	0.87	0.92
	9	four-item	Unequal	left	F	9	3	273	0		0.908333	0.951282	6.7	10.6	0.97	0.98
	18	four-item	Unequal	left	F	8	26	266	2		1	1	11.5	10.7	0.95	0.96
	26	four-item	Unequal	left	F	9	28	298	3+		0.98	0.97	16.1	14.7	0.95	0.88
	10	four-item	Equal	right	M	9	7	277	0		0.875	0.976923	40.7	23.1	0.93	0.94
	12	four-item	Equal	right	M	9	25	295	1		0.975	0.979487	21.4	18.5	0.94	0.9
	15	four-item	Equal	right	M	9	7	277	0		0.95	0.892308	23	22.9	0.95	0.91
	16	four-item	Equal	left	M	8	13	253	1		0.95	1	39.7	36.2	0.98	0.96
	23	four-item	Equal	left	M	9	5	275	1		0.9	1	23.2	14.5	0.88	0.97
	6	four-item	Equal	right	F	9	20	290	2		0.758333	0.958974	5.2	18.1	0.95	0.98
	7	four-item	Equal	right	F	9	0	270	0		0.725	0.925641	7.8	8.5	0.91	0.95
	11	four-item	Equal	left	F	9	15	285	1		0.975	0.989744	23.3	23	0.97	0.98
	13	four-item	Equal	left	F	9	25	295	0		1	0.984615	26.1	31.1	0.96	0.98
	21	four-item	Equal	left	F	8	18	258	1		1	1	22.1	9.8	0.91	0.88
							Means	275.3			0.925667	0.977218	20.22	19.165	0.9395	0.9515

## Sheet: Experiment 4
											Initial Stage (Percentage)			Final Stage (s)			Reliabilities (Percentage)
	Participant ID	Condition	Event	Give to/Give to first	Sex	Age (months)	Age (days)	Age in days (total)	Siblings		Familiarization Trial 1	Familiarization Trial 2	Test Trial	Familiarization Trial 1	Familiarization Trial 2	Test Trial	Familiarization Trial 1	Familiarization Trial 2	Test Trial
	40	Experimental	Unequal	right	M	4	8	128	0		0.908333	0.9	0.976923	6.6	6.8	19.2	0.95	0.81	0.96
	99	Experimental	Unequal	right	M	4	8	128	3+		0.766667	0.916667	0.980769	16.5	8.4	18.7	0.9	0.93	0.99
	15	Experimental	Unequal	left	M	5	8	158	1		0.916667	0.6	1	26.1	9	19.6	1	0.98	0.97
	37	Experimental	Unequal	left	M	5	0	150	1		1	1	1	42.6	16.7	42.9	0.99	0.92	0.99
	60	Experimental	Unequal	left	M	5	11	161	1		1	0.416667	0.984615	13.1	6.5	33	0.97	0.98	0.95
	1	Experimental	Unequal	right	F	4	17	137	0		0.875	0.933333	1	7.8	6.8	14.1	0.94	0.91	0.97
	3	Experimental	Unequal	right	F	4	26	146	0		1	0.633333	0.984615	21.6	22.5	35.7	0.91	0.92	0.98
	113	Experimental	Unequal	right	F	3	26	116	0		1	0.816667	1	60	15.5	26.6	0.96	0.92	1
	9	Experimental	Unequal	left	F	4	14	134	0		1	0.233333	1	24.1	6.1	15.5	0.95	0.96	0.98
	30	Experimental	Unequal	left	F	3	29	119	0		1	0.55	0.980769	26.3	6	25.2	0.91	0.69	0.97
	8	Experimental	Equal	right	M	5	12	162	0		1	0.783333	0.957692	6.5	13.5	9.9	0.99	1	0.96
	42	Experimental	Equal	right	M	3	25	115	3		1	1	0.973077	59.4	17	19.8	0.91	0.82	0.99
	13	Experimental	Equal	left	M	5	17	167	1		0.941667	0.816667	0.976923	26.3	13.9	10.7	0.99	0.79	0.96
	14	Experimental	Equal	left	M	5	0	150	0		1	1	1	18.7	7.5	10.8	0.98	0.63	1
	77	Experimental	Equal	left	M	5	18	168	1		1	1	0.984615	12	11.7	14.4	0.95	0.8	0.99
	2	Experimental	Equal	right	F	3	21	111	1		1	1	1	23.3	9.8	8.7	0.98	0.97	0.99
	5	Experimental	Equal	right	F	4	27	147	1		1	1	0.934615	9	22.4	18.5	0.82	0.55	1
	83	Experimental	Equal	right	F	4	13	133	2		0.916667	0.716667	0.569231	22.3	8.6	8.1	0.94	0.87	0.99
	11	Experimental	Equal	left	F	5	4	154	1		0.95	0.1	0.980769	12.6	10	8.1	0.92	0.79	0.99
	101	Experimental	Equal	left	F	4	26	146	0		0.966667	0.6	0.992308	8.5	7	11.2	0.97	0.89	0.99
							Means	141.5			0.962083	0.750833	0.963846	22.165	11.285	18.535	0.9465	0.8565	0.981
	76	Inanimate-Control	Unequal	right	M	3	24	114	0		1	0.866667	0.796154	22.8	5.2	11.2	0.96	0.923	0.94
	72	Inanimate-Control	Unequal	right	M	3	21	111	0		1	0.0833333	1	8.8	44.9	12.5	0.99	0.94	0.98
	43	Inanimate-Control	Unequal	left	M	5	15	165	1		0.683333	0.716667	0.919231	6.1	5.1	8	0.82	0.36	0.81
	44	Inanimate-Control	Unequal	left	M	5	16	166	1		0.75	0.833333	0.946154	16.9	23.7	24.8	0.98	0.88	0.96
	126	Inanimate-Control	Unequal	left	M	5	10	160	0		0.933333	0.833333	1	52	20.7	22.8	0.91	0.93	0.92
	48	Inanimate-Control	Unequal	right	F	4	2	122	0		1	1	0.834615	41.6	16.1	11.9	0.98	0.93	0.92
	78	Inanimate-Control	Unequal	right	F	3	21	111	1		0.866667	0.316667	0.965385	60	60	38.6	0.94	0.93	0.96
	80	Inanimate-Control	Unequal	right	F	5	17	167	1		0.891667	0.716667	0.973077	31.7	14.7	13.3	0.97	0.89	1
	47	Inanimate-Control	Unequal	left	F	4	25	145	1		0.95	0.683333	0.869231	6.6	7.3	8.7	0.95	0.86	0.94
	50	Inanimate-Control	Unequal	left	F	3	27	117	0		1	0.883333	0.980769	7.2	9.2	8.4	0.96	0.97	0.9
	68	Inanimate-Control	Equal	right	M	4	25	145	1		0.7	0.433333	0.834615	5.5	14.3	8.7	0.98	0.96	0.89
	84	Inanimate-Control	Equal	right	M	4	23	143	0		0.808333	1	1	17.8	13.3	24.4	0.82	0.85	0.82
	128	Inanimate-Control	Equal	right	M	4	29	149	0		0.7	1	0.980769	18.9	6.7	9.8	0.94	1	0.91
	49	Inanimate-Control	Equal	left	M	4	22	142	2		0.25	0.783333	1	21.3	60	8.8	0.93	1	0.92
	87	Inanimate-Control	Equal	left	M	5	1	151	0		0.791667	0.9	0.934615	25.5	44.1	37.3	0.98	0.89	0.98
	81	Inanimate-Control	Equal	right	F	5	13	163	0		0.916667	0.816667	0.965385	47.3	11.3	10.6	1	0.92	0.94
	123	Inanimate-Control	Equal	right	F	3	21	111	1		1	1	0.980769	26.2	15.5	12.9	0.97	0.78	0.95
	46	Inanimate-Control	Equal	left	F	4	28	148	0		0.875	1	0.965385	27.3	35.6	8.6	0.94	0.98	0.78
	74	Inanimate-Control	Equal	left	F	5	13	163	0		0.933333	0.45	0.965385	44	7.9	19.7	0.88	0.92	1
	75	Inanimate-Control	Equal	left	F	4	2	122	2		1	1	1	15.3	9.9	14.9	1	0.99	0.98
							Means	140.75			0.8525	0.765833	0.945577	25.14	21.275	15.795	0.945	0.89515	0.925
